# Supplementary material
Source: Royal Society of Chemistry journal article supplement (doi:10.1039/d6qm00134c)
Supplement: d6qm00134c1.pdf [file d6qm00134c1.pdf]

Supplementary materials for

## **2D Zn/ZnO via the Solid-Liquid Interfacial Engineering for Room Temperature Optoelectronic Gas Sensing**

Xiao Long Cao<sup>1</sup>, Zhong Li<sup>1,2 \*</sup>, Kai Yu Yao<sup>1</sup>, Fei Yue Wu<sup>1</sup>, Bo Xin Hu<sup>1</sup>, Tao Tang<sup>1 \*</sup>,  
Yin Fen Cheng<sup>3</sup>, Yi Liang<sup>1</sup>, Jing Hao Zhuang<sup>1</sup>, Xin Yi Hu<sup>1</sup>, Qi Zhang<sup>1</sup>, Nianzhong Ma<sup>1</sup>,  
Yao Yang Liu<sup>1</sup>, Qing Wen Song<sup>1</sup>, Qian Wang<sup>4</sup>, Dazhi Chen<sup>1</sup>, and Jian Zhen Ou<sup>1,5 \*</sup>

<sup>1</sup>Key Laboratory of Advanced Technologies of Materials, Ministry of Education,  
School of Materials Science and Engineering, Southwest Jiaotong University, Chengdu  
610031, China

<sup>2</sup>Jiangsu Key Laboratory of Advanced Structural Materials and Application  
Technology, Nanjing Institute of Technology, Nanjing 211167, China

<sup>3</sup>Institute of Advanced Study, Chengdu University, Chengdu 610106, China

<sup>4</sup>School of Material Science and Engineering, Lanzhou Jiaotong University, Lanzhou  
730070, PR China.

<sup>5</sup>School of Engineering, RMIT University, Melbourne, Victoria 3000, Australia

\*Corresponding author. E-mail: zhong.li@swjtu.edu.cn (Z. Li),  
tangtao@my.swjtu.edu.cn (T Tang), jzou@swjtu.edu.cn, jianzhen.ou@rmit.edu.au (J.  
Z. Ou)

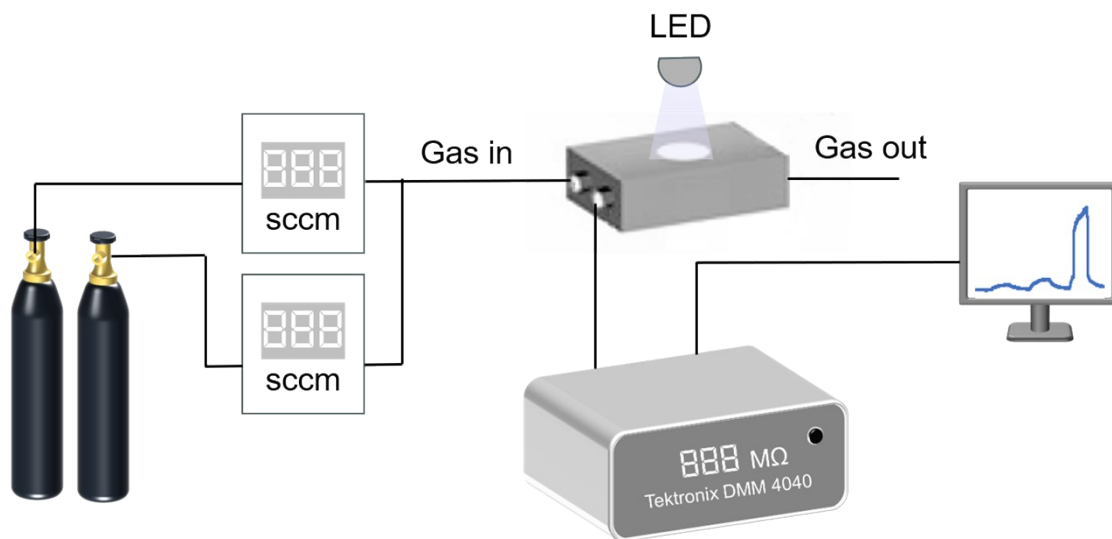

**Fig. S1** Schematic of the set-up used for gas sensing tests.

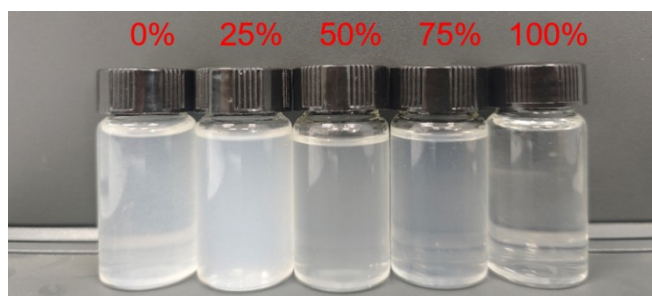

**Fig. S2** The photograph of Zn/ZnO heterostructure suspension obtained in the mixed solution containing 0, 25, 50, 75, 100%v/v ethanol.

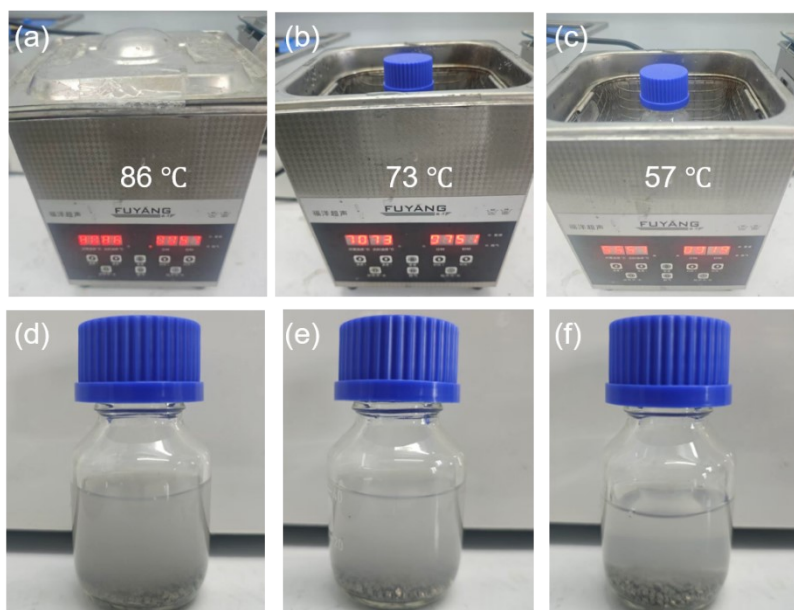

**Fig. S3** a)-c) The ultrasonic temperature control at 86 °C, 73 °C, and 57 °C is achieved

by closing the cover of the ultrasound machine and turning on heating at the same time, opening the cover of the ultrasound machine and turning on heating, and just opening the lid of the ultrasound machine, respectively. d)-f) The dispersion of Zn/ZnO obtained from sonicated Zn particles at 86 °C, 73 °C, and 57 °C, respectively.

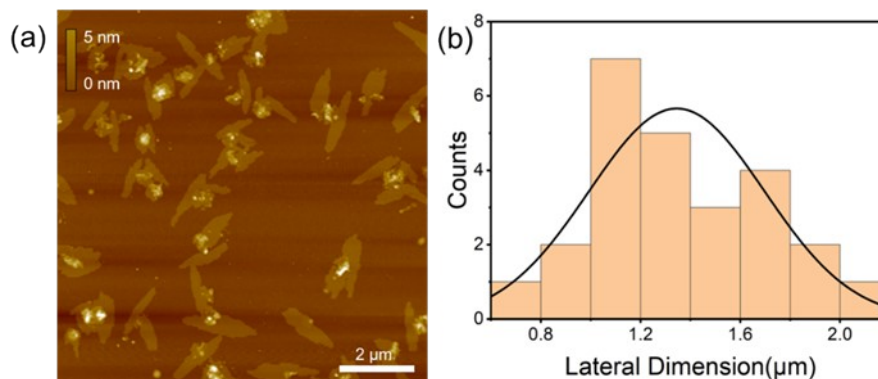

**Fig. S4** The statistical analysis of the lateral dimension of ZnO nanosheets.

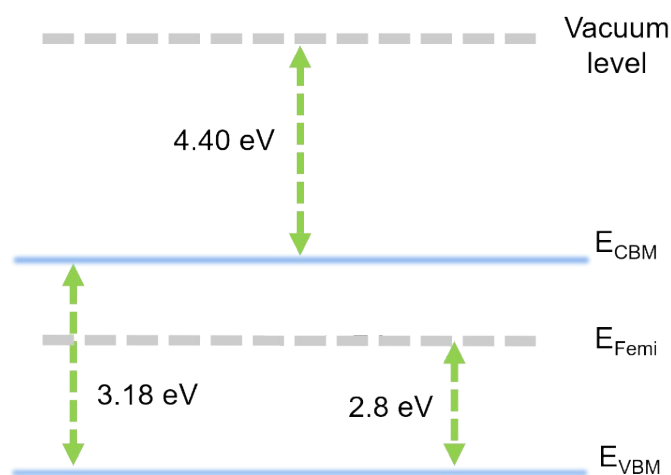

**Fig. S5** The energy band diagram of Zn/ZnO heterostructure.

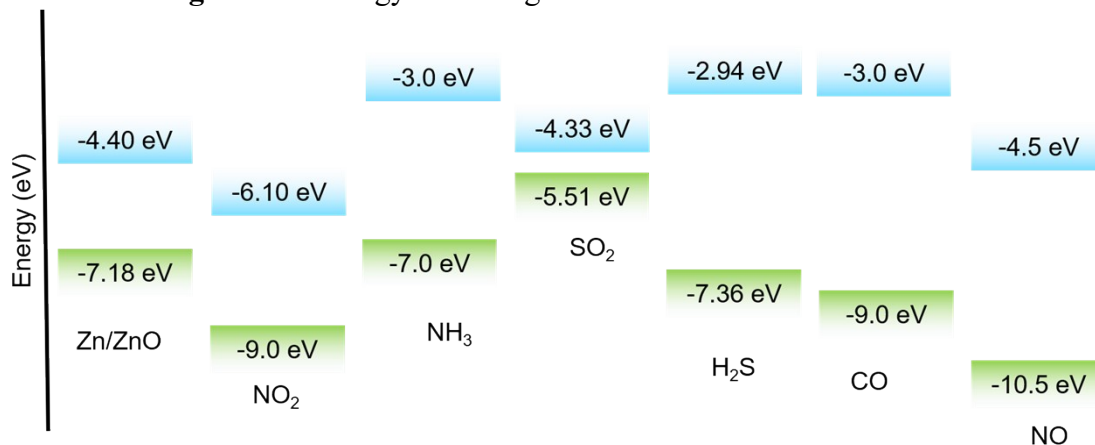

**Fig.S6** Energy band diagram of 2D Zn/ZnO, NO<sub>2</sub>, NH<sub>3</sub>, SO<sub>2</sub>, H<sub>2</sub>S, CO and NO

molecule.

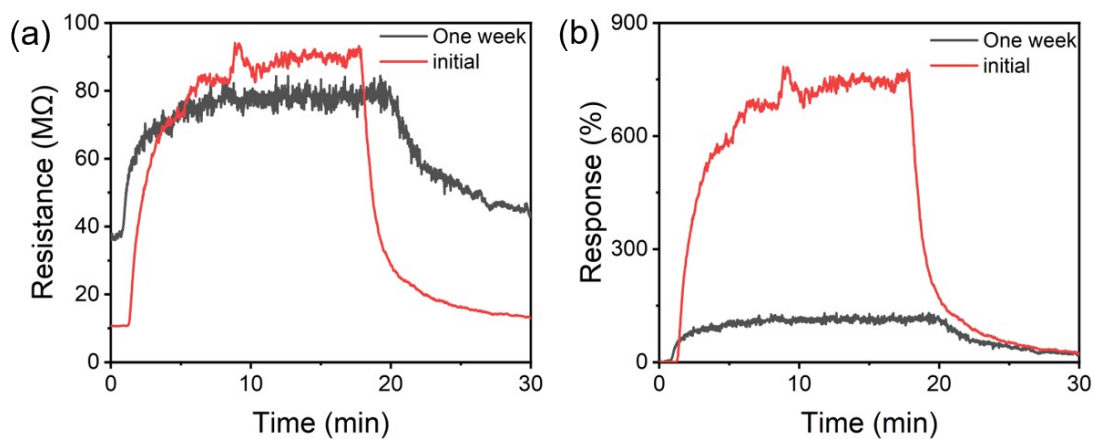

**Fig. S7** Long-term stability of the Zn/ZnO heterostructure sensor to 10 ppm NO<sub>2</sub> at room temperature and purple light. (a) The resistance curves and (b) corresponding response curves.

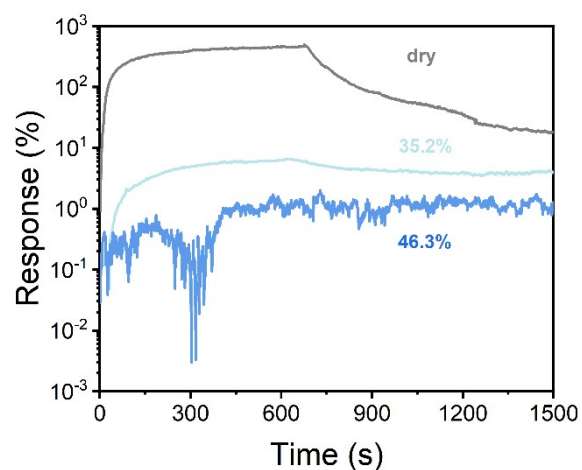

**Fig. S8** The logarithmic plot of gas response of the Zn/ZnO heterostructure sensor to 5 ppm NO<sub>2</sub> at room temperature, purple light irradiation and different humidity level.

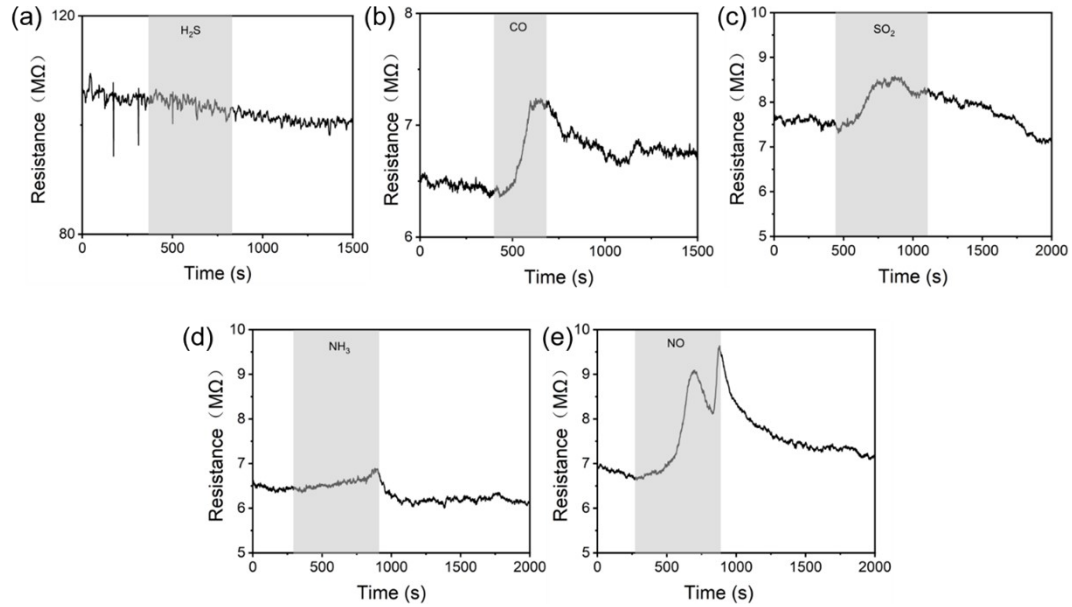

**Fig. S9** Resistance transient of Zn/ZnO heterostructure based sensor under (a) 50 ppm H<sub>2</sub>S, (b) 500 ppm CO, (c) 50 ppm SO<sub>2</sub>, (d) 300 ppm NH<sub>3</sub> and (e) 10 ppm NO.

**Table S1** The sensing performance comparison of Zn/ZnO heterostructure based sensor towards 10 ppm NO<sub>2</sub> under the different light irradiation.

| Light source | Wavelength (nm) | Baseline resistance (MΩ) | Response (%) | Recovery time (min) |
|--------------|-----------------|--------------------------|--------------|---------------------|
| UV           | 365             | 4                        | 293.3        | 5.23                |
| Purple       | 405             | 10                       | 705.3        | 5.79                |
| Blue         | 450             | 560                      | 29.1         | 6.85                |
| No light     | -               | Overload                 | -            | -                   |

**Table S2** Ppb-level NO<sub>2</sub> gas sensing performance of different gas sensors.

| Materials                                                      | Conc. (ppb) | Temp. (°C) | Res.  | Synthesis method              | Sensor device fabrication | Comments                   |
|----------------------------------------------------------------|-------------|------------|-------|-------------------------------|---------------------------|----------------------------|
| Co-SnS <sub>2</sub> <sup>1</sup>                               | 1           | 190        | 89.7% | Hydrothermal                  | Electrode deposition      | High work temperature      |
| ZnO/Ti <sub>3</sub> C <sub>2</sub> T <sub>x</sub> <sup>2</sup> | 500         | 180        | 46.3% | Solvothermal + Etching        | Drop-casting              |                            |
| MoO <sub>3</sub> <sup>3</sup>                                  | 50          | 100        | 2.3%  | Dual-zone finance             | Electrode deposition      |                            |
| In <sub>2</sub> O <sub>3</sub> <sup>4</sup>                    | 50          | 92         | 40%   | Biomass-templated calcination | Drop-casting              |                            |
| MoS <sub>2</sub> <sup>5</sup>                                  | 2.5         | RT         | 1120% | Mechanical exfoliation        | Electrode deposition      | Complex device preparation |

|                                      |     |    |       |                       |              |                                                                         |
|--------------------------------------|-----|----|-------|-----------------------|--------------|-------------------------------------------------------------------------|
|                                      |     |    |       | + Etching             |              |                                                                         |
| MoS <sub>2</sub> <sup>6</sup>        | 120 | RT | ~40%  | CVD                   |              |                                                                         |
| SnS <sub>2</sub> /MWCNT <sup>7</sup> | 25  | 20 | 3%    | Hydrothermal          | Drop-casting | Long material synthesis time                                            |
| Zn/ZnO<br>(This work)                | 50  | RT | 14.5% | Solid-liquid reaction |              | Short material synthesis time;<br>Simple device preparation;<br>RT work |

## Reference

1. J. N. Chang, C. Qin, Y. Zhang, L. H. Zhu, Y. Zhang, Y. Wang and J. L. Cao, Abundant active sites triggered by Co-doped SnS<sub>2</sub> for ppb-level NO<sub>2</sub> detection, *Sens. Actuator B-Chem.*, 2023, 395, 11.
2. L. Chen, X. Chen, F. Wang, Y. Tong, K. W. Zhang, Z. B. Han and M. Z. Zhang, MOF-derived ZnO/Ti<sub>3</sub>C<sub>2</sub>T<sub>x</sub> MXene heterostructures for ultrafast ppb-level detection of H<sub>2</sub> and NO<sub>2</sub> gases, *Sens. Actuator B-Chem.*, 2026, 447, 10.
3. W. Li, Q. D. Ou, X. D. Wang, K. J. Xing, T. Tesfamichael, N. Motta and D. C. Qi, Large-sized  $\alpha$ -MoO<sub>3</sub> layered single crystals for superior NO<sub>2</sub> gas sensing, *Applied Surface Science*, 2022, 586, 12.
4. N. Wang, J. X. Ye, J. B. Sun, X. F. Zhang, Z. P. Deng, Y. M. Xu, L. H. Huo and S. Gao, Rapid and accurate detection of highly toxic NO<sub>2</sub> gas based on catkins biomass-derived porous In<sub>2</sub>O<sub>3</sub> microtubes at low temperature, *Sens. Actuator B-Chem.*, 2022, 361, 10.
5. A. V. Agrawal, A. Y. Polyakov, J. Eriksson, T. J. Antosiewicz and T. O. Shegai, Humidity-Enhanced NO<sub>2</sub> Gas Sensing Using Atomically Sharp Edges in Multilayer MoS<sub>2</sub>, *Small Struct.*, 2025, 6, 15.
6. B. Cho, A. R. Kim, Y. Park, J. Yoon, Y. J. Lee, S. Lee, T. J. Yoo, C. G. Kang, B. H. Lee, H. C. Ko, D. H. Kim and M. G. Hahm, Bifunctional Sensing Characteristics of Chemical Vapor Deposition Synthesized Atomic-Layered MoS<sub>2</sub>, *ACS Appl. Mater. Interfaces*, 2015, 7, 2952-2959.
7. I. S. Saggu, S. Singh, K. W. Chen, Z. X. Xuan, M. T. Swihart and S. Sharma, Ultrasensitive Room-Temperature NO<sub>2</sub> Detection Using SnS<sub>2</sub>/MWCNT Composites and Accelerated Recovery Kinetics by UV Activation, *ACS Sens.*, 2023.
